# Supplementary material for: Infection of Human Tracheal Epithelial Cells by H5 Avian Influenza Virus Is Regulated by the Acid Stability of Hemagglutinin and the pH of Target Cell Endosomes
Source: MDPI journal article supplement (doi:10.3390/v12010082), 2020-01-09
Supplement: s1 [file s1]

## **Supplementary Information**

**Infection of human tracheal epithelial cells by H5 avian influenza virus is regulated by the acid stability of hemagglutinin and the pH of target cell endosomes**

Tomo Daidoji, Junichi Kajikawa, Yasuha Arai, Yohei Watanabe, Ryohei Hirose, Takaaki Nakaya

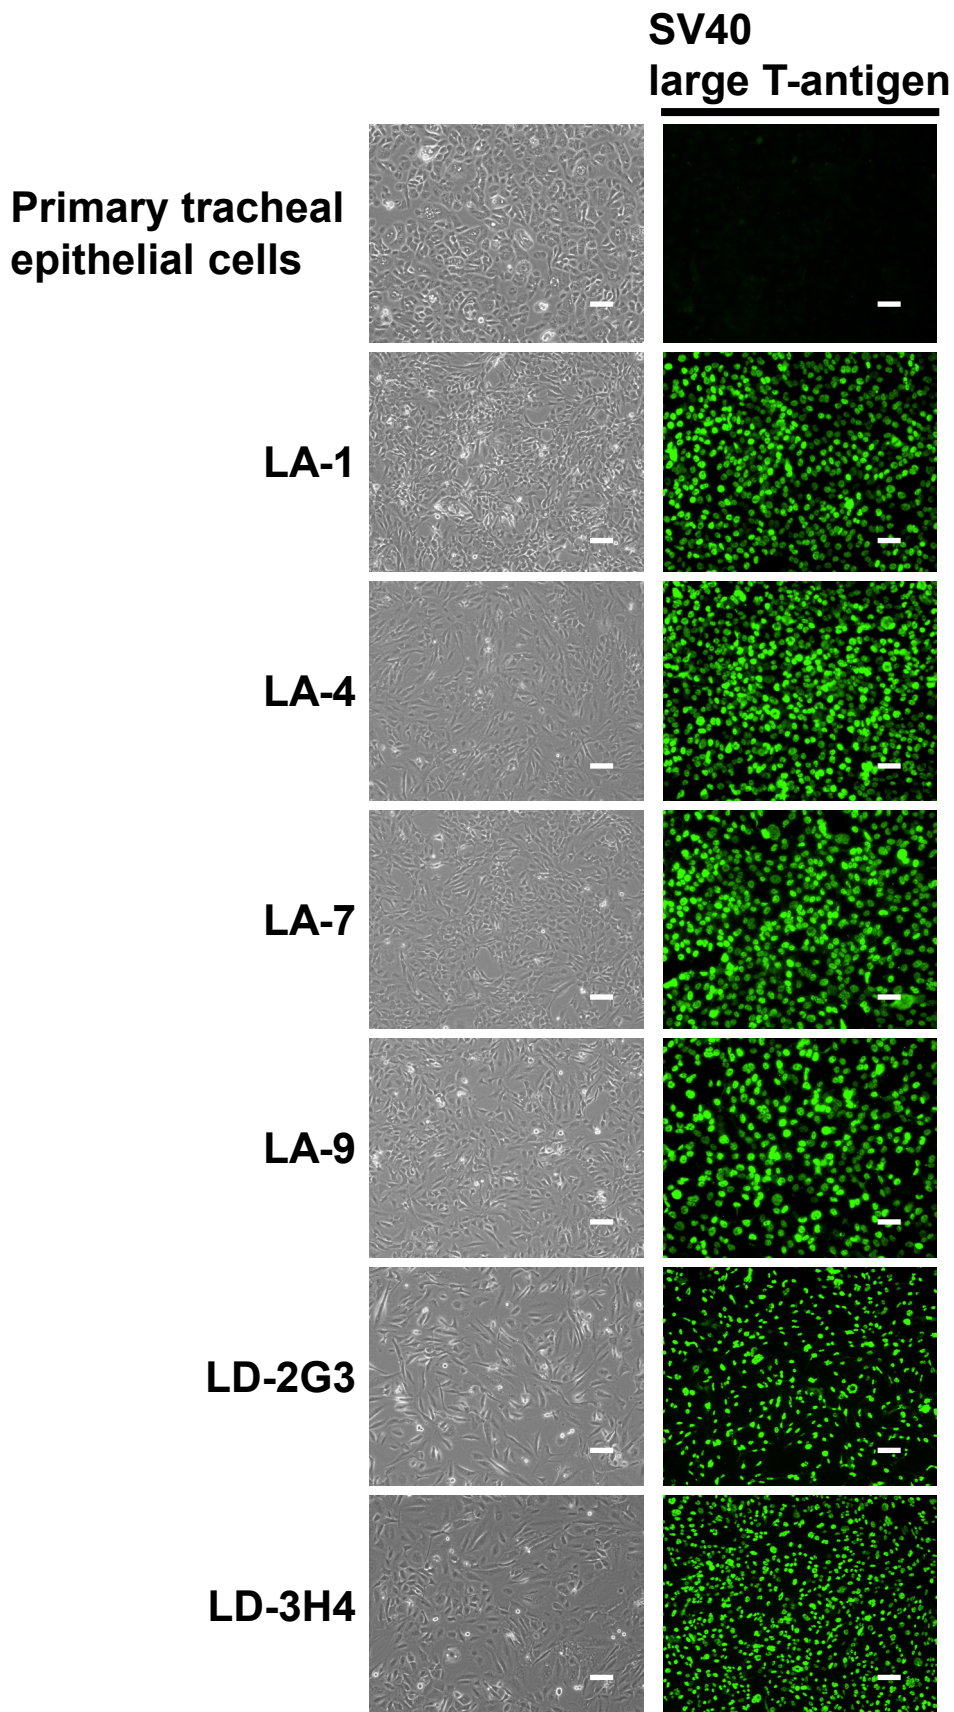

**Figure S1. Establishment of human tracheal epithelial cell clones.**

Morphology (left panels) and immunostaining (right panels) of primary human tracheal epithelial cells (HTEpCs; a mixed population) and their resultant clones (HTEpCs-T; LA-1, LA-4, LA-7, LA-9, LD-2G3, and LD-3H4) for expression of the SV40 large T-antigen. Scale bars, 100  $\mu$ m.

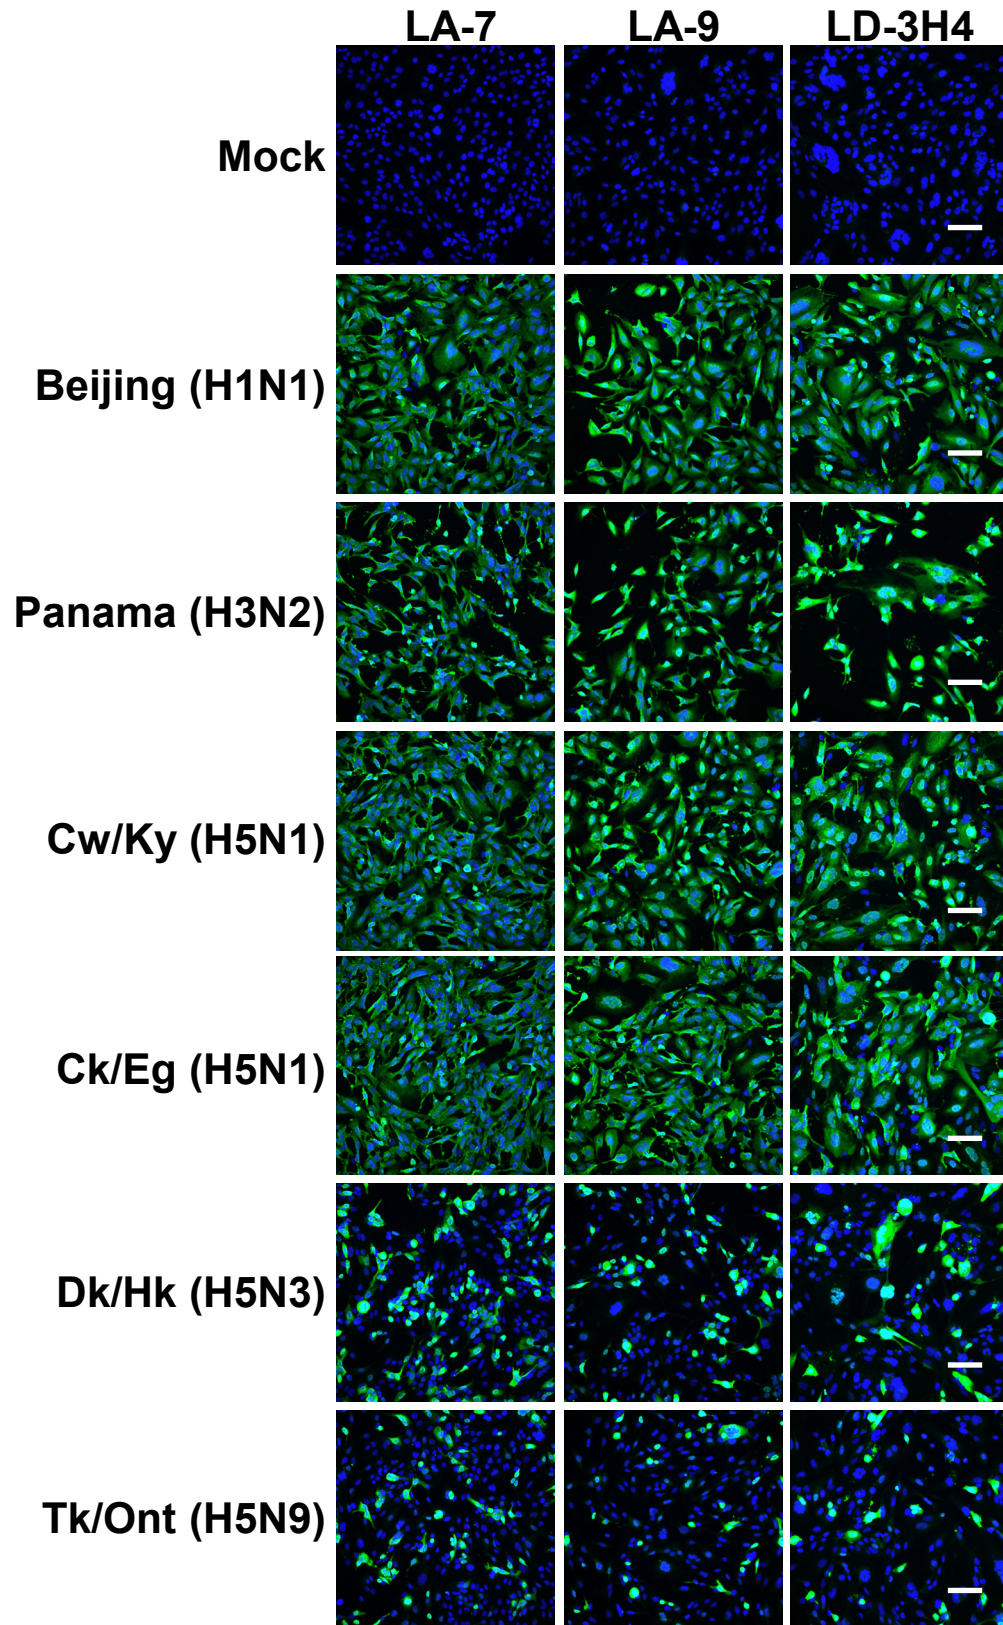

**Figure S2. Viral antigen expression in human tracheal epithelial cell clones.**

Representative HTEpC-T clones (LA-7, LA-9 and LD-3H4) were infected with different strains of human influenza virus: Beijing (H1N1) and Panama (H3N2); H5N1 [Cw/Ky (H5N1) and Ck/Eg (H5N1)]; and previously circulating AIVs [Dk/Hk (H5N3) and Tk/Ont (H5N9)]. All cells were infected at a multiplicity of infection of 10. Viral antigens were detected by immunostaining (see “Materials and methods”) at 16 h post-infection (green). Cell nuclei were counterstained with Hoechst 33342 (blue). Scale bars, 100  $\mu$ m.

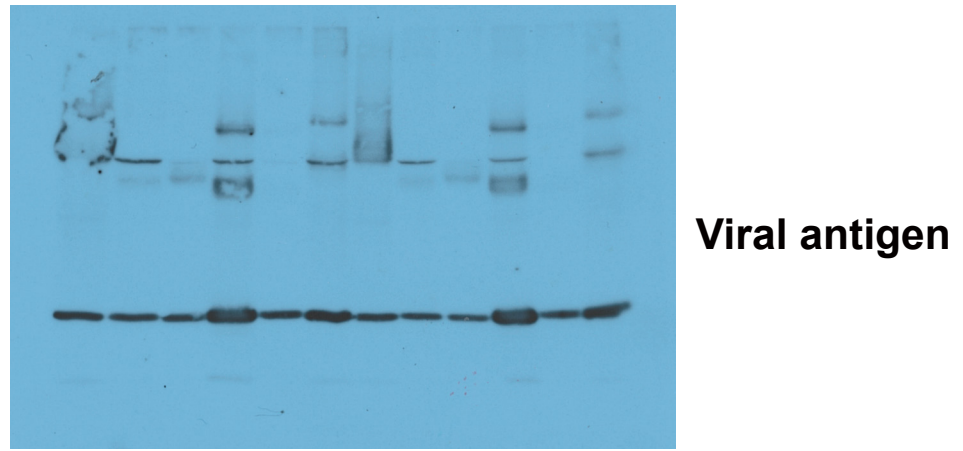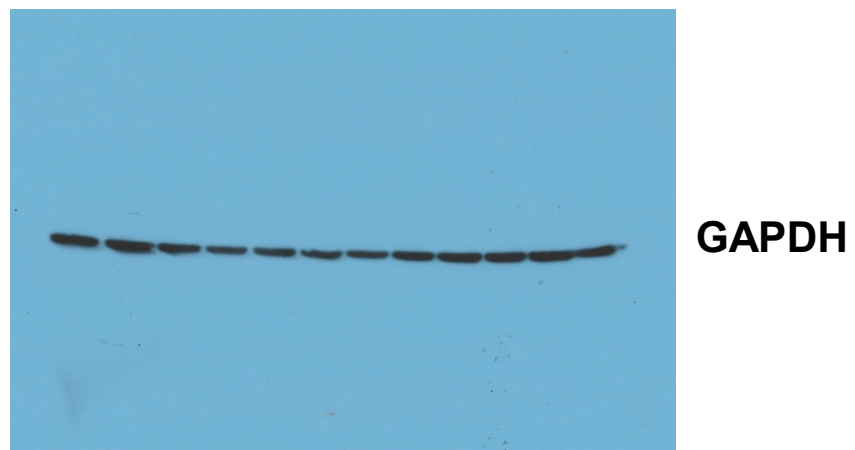

**Figure S3. Uncropped images of the Western blots in Figure 3.**



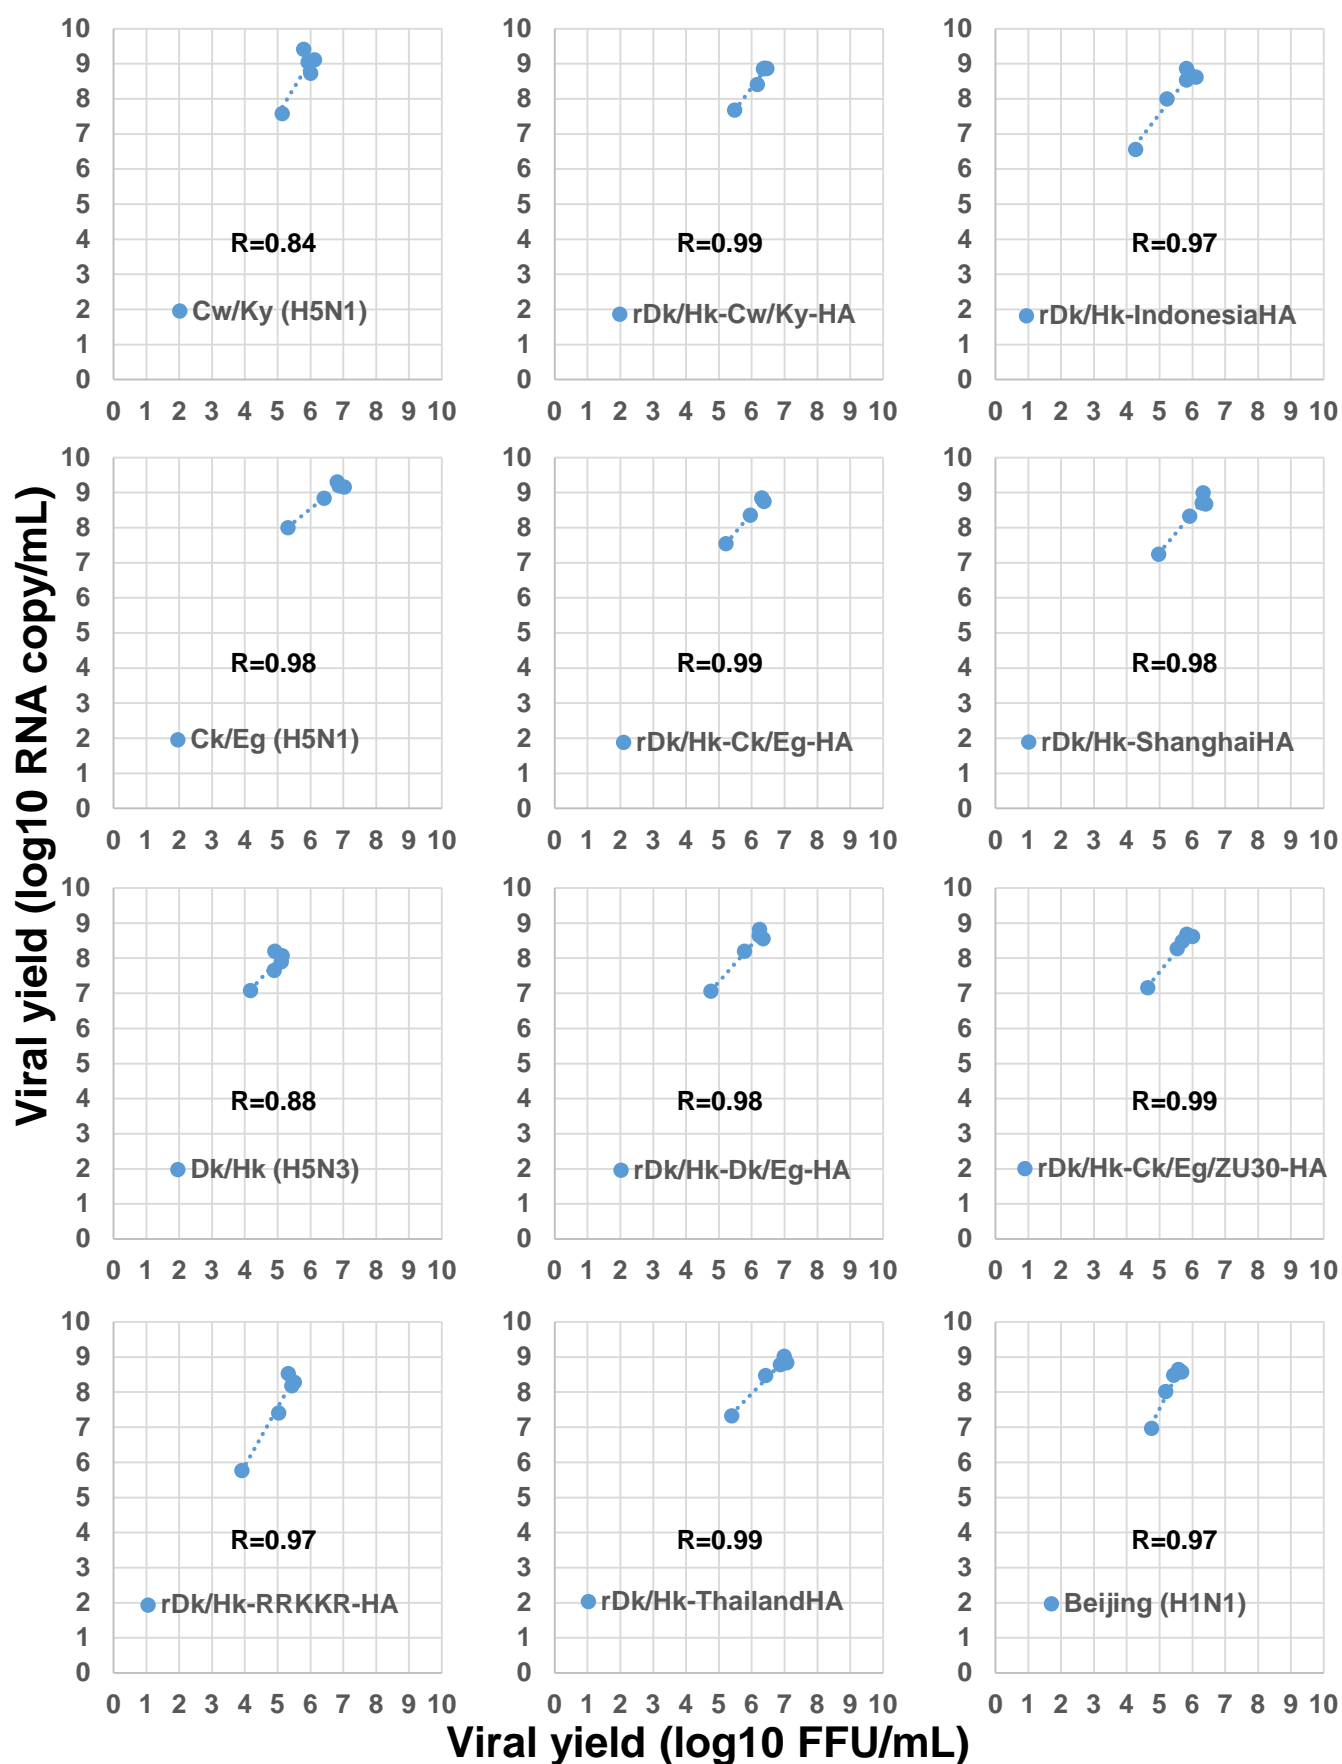

**Figure S4. Graphs showing the correlation between copy number and infectious titer of virus particles released from infected HTEpCs.**

Each parameter was taken from Figure 7A and 7B. The virus names are the same as those described in Figure 7.
