# Supplementary material for: Infection of Human Tracheal Epithelial Cells by H5 Avian Influenza Virus Is Regulated by the Acid Stability of Hemagglutinin and the pH of Target Cell Endosomes
Source: MDPI journal article supplement (doi:10.3390/v12010082), 2020-01-09
Supplement: s1 [file s1]

**TABLE S1. Summary of the pH thresholds for viral–cell membrane fusion for all AIV strains used in this study**

| <b>Viral strain</b>              | <b>pH thresholds</b> |
|----------------------------------|----------------------|
| A/crow/Kyoto/53/04 (H5N1)        | 5.625                |
| A/chicken/Egypt/CL6/07 (H5N1)    | 5.625                |
| A/duck/Egypt/D1Br12/2007 (H5N1)  | n.d.                 |
| A/Thailand/Kan353/04 (H5N1)      | 5.75                 |
| A/Indonesia/5/05 (H5N1)          | 5.625                |
| A/Shanghai/1/06 (H5N1)           | 5.625                |
| A/chicken/Egypt/ZU30/2016 (H5N1) | n.d.                 |
| A/Duck/Hong Kong/820/80 (H5N3)   | 5.375                |
| A/Turkey/Ontario/7732/66 (H5N9)  | 5.125                |

These parameters were originally published in Daidoji et al. (34) ©American Society for Biochemistry and Molecular Biology.
